# Supplementary material for: Efficacy and Mechanism of the Action of Live and Heat-Killed Bacillus coagulans BC198 as Potential Probiotic in Ameliorating Dextran Sulfate Sodium-Induced Colitis in Mice
Source: PubMed Central journal article supplement (PMC10918820; doi:10.1021/acsomega.3c07529), 2024-02-20
Supplement: ao3c07529_si_001.pdf [file ao3c07529_si_001.pdf]

## Supporting materials

### **Efficacy and mechanism of action of live and heat-killed *Bacillus coagulans* BC198 as potential probiotic in ameliorating DSS-induced colitis in mice**

**Yen-Chun Koh<sup>1#</sup>, Ya-Chu Chang<sup>1#</sup>, Wei-Sheng Lin<sup>1,2</sup>, Siu-Yi Leung<sup>1</sup>, Wei-Jen Chen<sup>3</sup>, Shiuan-Huei Wu<sup>3</sup>, Yu-Shan Wei<sup>4</sup>, Chiau-Ling Gung<sup>4</sup>, Ya-Chun Chou<sup>1</sup>, Min-Hsiung Pan<sup>1,5,6</sup>**

[1] Institute of Food Sciences and Technology, National Taiwan University, Taipei, Taiwan

[2] Department of Food Science, National Quemoy University, Quemoy, Taiwan

[3] Biotech Department, Syngen Biotech Co., Ltd., Tainan, Taiwan

[4] Research and Development Department, Syngen Biotech Co., Ltd., Tainan, Taiwan

[5] Department of Medical Research, China Medical University Hospital, China Medical University, Taichung City, Taiwan

[6] Department of Health and Nutrition Biotechnology, Asia University, Taichung City, Taiwan

# The authors contribute equally

\* Please send all correspondence to:

Dr. Min-Hsiung Pan

Institute of Food Science and Technology,

National Taiwan University,

No. 1, Section 4, Roosevelt Road, Taipei 10617, Taiwan.

Tel. no. +886-2-33664133

Fax. no. +886-2-33661771

E-mail: mhpan@ntu.edu.tw

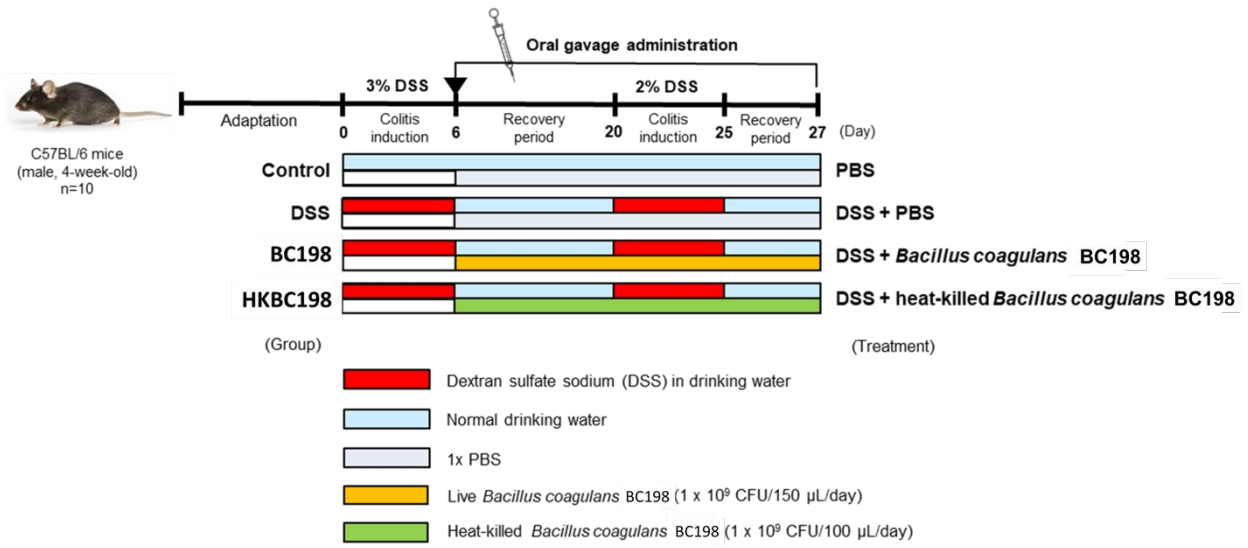

**Figure S1. Experimental design.**

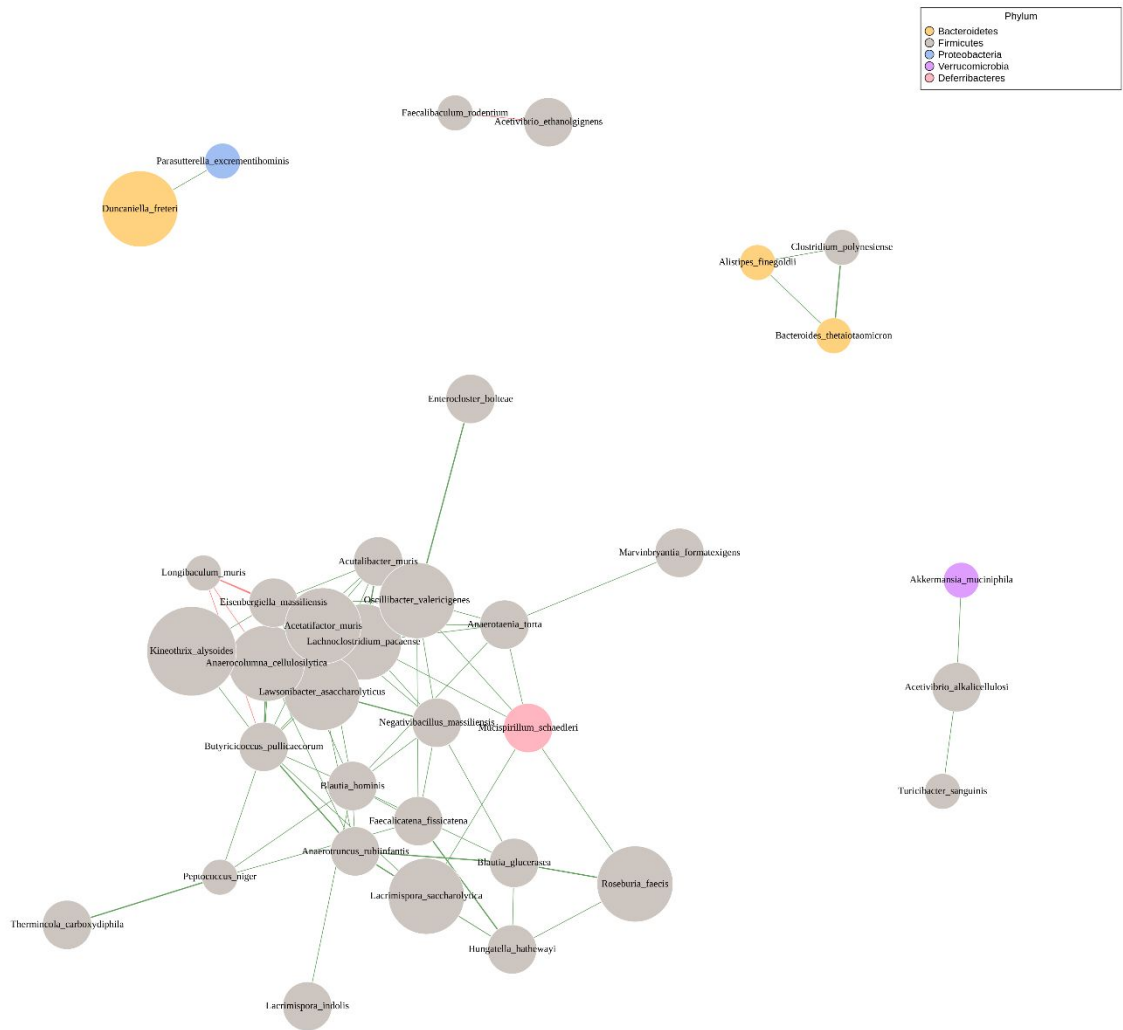

**Figure S2. Network of correlations between species identified in this study.**

The threshold correlation coefficient was set at 0.8. The species presented above were significantly different between all experimental groups.
